# Supplementary material for: Overexpressed Proteins in HCC Cell-Derived Exosomes, CCT8, and Cofilin-1 Are Potential Biomarkers for Patients with HCC
Source: MDPI journal article supplement (doi:10.3390/diagnostics11071221), 2021-07-06

# Overexpressed Proteins in HCC cell-derived Exosomes, CCT8 and Cofilin-1, are Potential Biomarkers for Patients with HCC

**Supplementary Table S1. Proteins identified by mass spectrometry**

|       | Spot ID | Protein GI accession          | DAVID gene symbol             |
|-------|---------|-------------------------------|-------------------------------|
| Hep3B | 151     | gi28592                       | ALB                           |
|       | 228     | gi582045552                   | ALB                           |
|       | 256     | No significant hits to report | No significant hits to report |
|       | 344     | No significant hits to report | No significant hits to report |
|       | 362     | gi31676                       | GC                            |
|       | 589     | gi902787                      | YWHAE                         |
|       | 597     | gi136408                      | PRSS1                         |
|       | 598     | No significant hits to report | No significant hits to report |
|       | 668     | gi37637                       | ANXA5                         |
|       | 709     | gi902787                      | YWHAE                         |
|       | 771     | No significant hits to report | No significant hits to report |
|       | 856     | gi1025735596                  | CFL1                          |
|       | 1100    | No significant hits to report | No significant hits to report |
|       | 1126    | gi287641                      | PRDX1                         |
| Huh7  | 325     | gi35655                       | P4HB                          |
|       | 441     | gi32478                       | HSPB1                         |
|       | 477     | gi119339                      | ENO1                          |
|       | 480     | gi119339                      | ENO1                          |
|       | 541     | gi28252                       | ACTB                          |
|       | 543     | gi28252                       | ACTB                          |
|       | 603     | gi435476                      | KRT9                          |
|       | 668     | gi37637                       | ANXA5                         |
|       | 685     | gi37202                       | TPM4                          |
|       | 688     | gi37403                       | Unnamed                       |
|       | 713     | No significant hits to report | No significant hits to report |
|       | 732     | gi28252                       | ACTB                          |
|       | 746     | gi130348                      | PGAM1                         |
|       | 756     | No significant hits to report | No significant hits to report |
|       | 805     | No significant hits to report | No significant hits to report |
|       | 814     | No significant hits to report | No significant hits to report |
|       | 839     | gi435476                      | KRT9                          |

|       |      |                               |                               |
|-------|------|-------------------------------|-------------------------------|
|       | 1100 | No significant hits to report | No significant hits to report |
|       | 1105 | gi30501                       | DEFA3                         |
|       | 1120 | gi1136741                     | CCT8                          |
|       | 1122 | No significant hits to report | No significant hits to report |
|       | 1125 | gi186772                      | KRT1                          |
|       | 355  | gi37492                       | TUBA1A                        |
|       | 356  | gi37492                       | TUBA1A                        |
|       | 378  | gi2674062                     | PHGDH                         |
|       | 379  | gi37494                       | TUBB4B                        |
|       | 406  | gi35959                       | TUBB4A                        |
|       | 433  | gi263098                      | TBP                           |
|       | 545  | No significant hits to report | No significant hits to report |
|       | 548  | No significant hits to report | No significant hits to report |
|       | 557  | gi30251                       | CLU                           |
| THLE2 | 571  | No significant hits to report | No significant hits to report |
|       | 579  | gi30251                       | CLU                           |
|       | 606  | gi32015                       | TUBA4A                        |
|       | 630  | No significant hits to report | No significant hits to report |
|       | 646  | No significant hits to report | No significant hits to report |
|       | 717  | gi37494                       | TUBB4B                        |
|       | 774  | No significant hits to report | No significant hits to report |
|       | 776  | gi190879                      | RAN                           |
|       | 1103 | No significant hits to report | No significant hits to report |

**Supplementary Table S2. Expression of the 15 proteins which were markedly overexpressed ( $\geq 2.5$  times) in HCC cell-derived exosome rather than THLE2-derived exosomes in public gene expression data-sets**

|       | TCGA_LIHC    |         | ICGC_LIRI    |         | GSE77314     |         |
|-------|--------------|---------|--------------|---------|--------------|---------|
|       | Fold Changes | P value | Fold Changes | P value | Fold Changes | P value |
| CFL1  | 1.90         | 0.000   | 2.00         | 0.000   | 1.94         | 0.000   |
| PRSS1 | 1.58         | 0.000   | 1.06         | 0.011   | 1.20         | 0.080   |
| PRDX1 | 1.46         | 0.000   | 1.75         | 0.000   | 1.51         | 0.000   |
| YWHAE | 1.03         | 0.476   | 1.12         | 0.000   | -1.03        | 0.305   |
| GC    | 0.44         | 0.000   | -2.10        | 0.000   | -3.61        | 0.000   |
| ANXA5 | 1.60         | 0.000   | 1.22         | 0.004   | 1.33         | 0.007   |
| ENO1  | 1.65         | 0.000   | 1.61         | 0.000   | 2.49         | 0.000   |
| TPM4  | 1.73         | 0.000   | 1.45         | 0.000   | 1.42         | 0.003   |
| KRT1  | 0.70         | 0.074   | 1.00         | 0.834   | -1.01        | 0.297   |
| P4HB  | 1.52         | 0.000   | 1.68         | 0.000   | 1.43         | 0.000   |
| PGAM1 | 1.04         | 0.583   | 1.22         | 0.000   | 1.15         | 0.125   |
| CCT8  | 1.67         | 0.000   | 1.54         | 0.000   | 1.52         | 0.000   |
| KRT9  | 1.12         | 0.021   | 1.01         | 0.000   | 1.00         | 0.083   |
| DEFA3 | 0.34         | 0.000   | -1.11        | 0.000   | -1.13        | 0.047   |
| HSPB1 | 3.50         | 0.000   | 2.83         | 0.000   | 3.08         | 0.000   |

**Supplementary Figure S1.** Representative 2D proteomic maps of THLE-2, Hep3B, and Huh-7 cell lines.

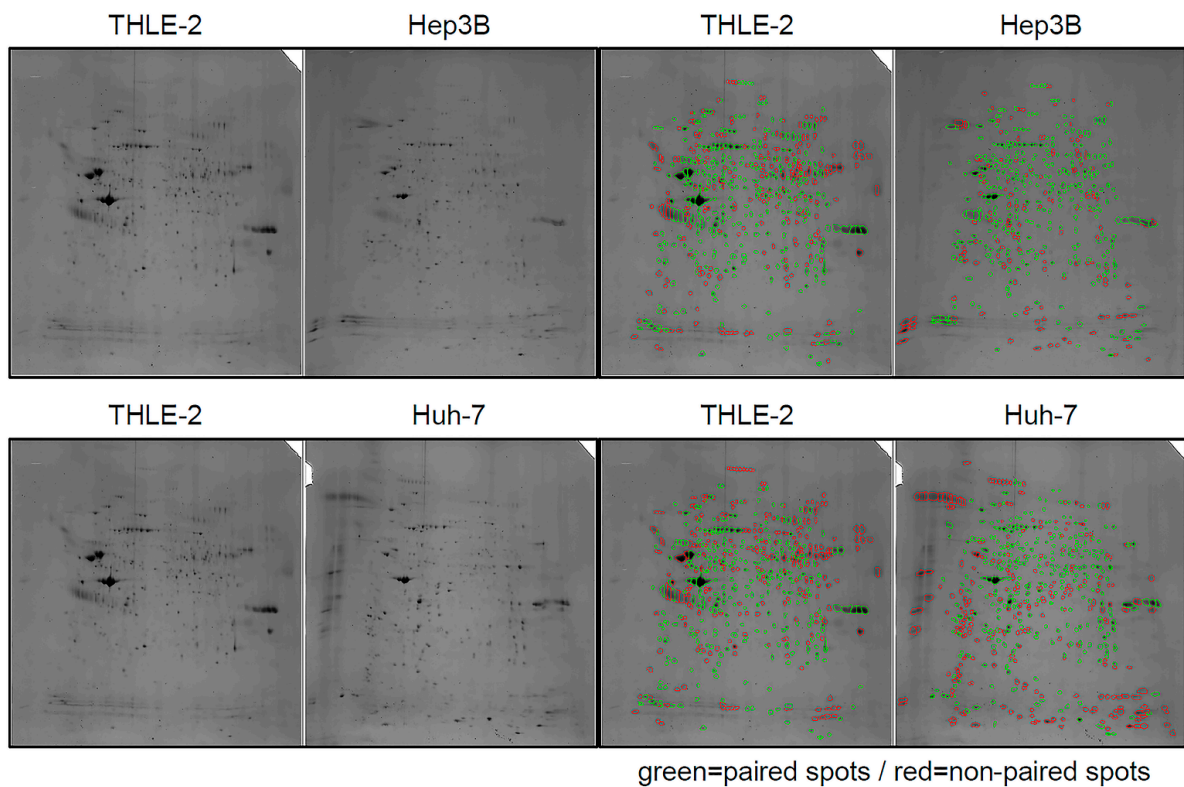

Supplement: s1 [file s1]
